# Supplementary material for: Continuous and direct ‘in situ’ reaction monitoring of chemical reactions via dielectric property measurement: controlled polymerisation
Source: Royal Society of Chemistry journal article supplement (doi:10.1039/c3ra46941g), 2013-12-18
Supplement: c3ra46941g.pdf [file c3ra46941g.pdf]

## Extra Scientific Information

### Continuous and Direct '*In Situ*' Reaction Monitoring of Chemical Reactions *via* Dielectric Property Measurement: Controlled Polymerisation

Mohd J. Kamaruddin,<sup>a</sup> Nam T. Nguyen,<sup>b</sup> Georgios A. Dimitrakis,<sup>a</sup> Jaouad El Harfi,<sup>a,b</sup> Eleanor R. Binner,<sup>a</sup> Sam W. Kingman,<sup>a</sup> Edward Lester,<sup>a</sup> John P. Robinson<sup>a</sup> and Derek J. Irvine<sup>a,b\*</sup>

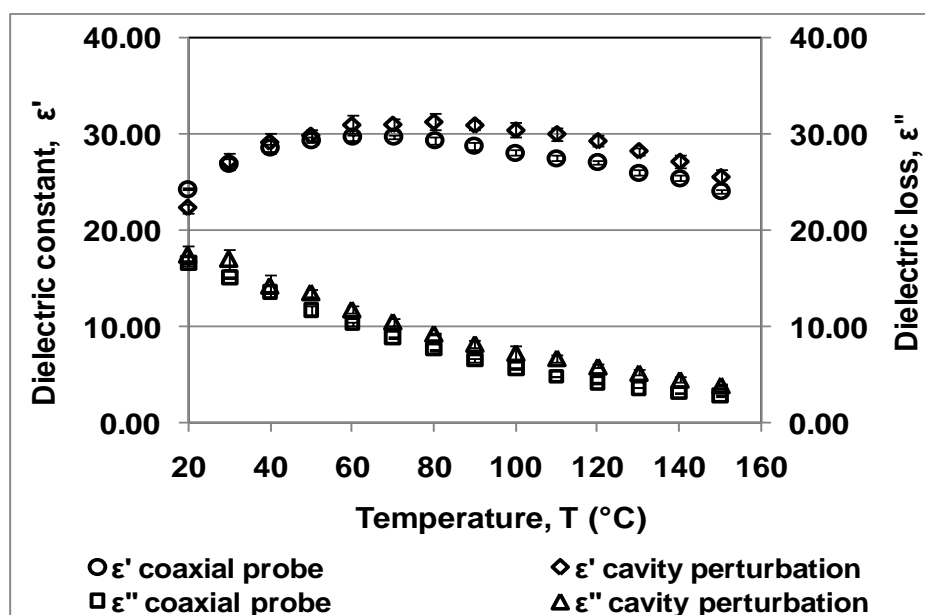

ESI Figure 1: Dielectric properties for CL, comparison between results produced by coaxial probe and cavity perturbation techniques.

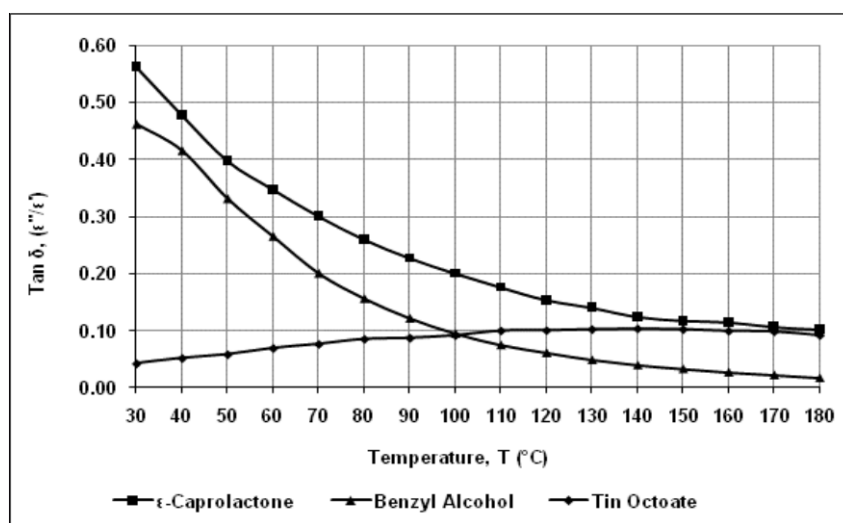

ESI Figure 1: 2 - Variation in the Loss tangent of PCL precursors at 2470 MHz versus temperature
